# Supplementary material for: Rare Earth Elements in Shells of Black Sea Molluscs: Anomalies and Biogeochemical Implications
Source: MDPI journal article supplement (doi:10.3390/jmse12050713), 2024-04-25
Supplement: s1 [file s1]

### Supplementary Material

to the article “Rare earth elements in shells of Black Sea molluscs: Anomalies and biogeochemical implications”

by Sergey V. Kapranov, Vitaliy I. Ryabushko, Julia D. Dikareva, Larisa L. Kapranova, Nikolay I. Bobko, and Sophia Barinova\*

**Table S1.** Element contents in the certified reference material BCR-670: mean  $\pm$  95% confidence interval (in mg·kg<sup>-1</sup> d.w.); recovery rates as 100 %·Observed / Certified; and relative errors as 100 %·(Observed—Certified) / Certified.

|    | Certified value | Observed value,<br>n=5 | Recovery rate, % | Relative error, % |
|----|-----------------|------------------------|------------------|-------------------|
| Ce | 0.99±0.04       | 0.85±0.09              | 86               | –14               |
| Dy | 0.079±0.007     | 0.096±0.023            | 122              | 22                |
| Er | 0.044±0.0028    | 0.064±0.033            | 145              | 45                |
| Eu | 0.0232±0.0015   | 0.035±0.025            | 151              | 51                |
| Gd | 0.098±0.008     | 0.115±0.019            | 117              | 17                |
| Ho | 0.0158±0.0018   | 0.033±0.017            | 209              | 109               |
| La | 0.487±0.02      | 0.42±0.13              | 86               | –14               |
| Lu | 0.0063±0.0005   | 0.010±0.006            | 159              | 59                |
| Nd | 0.473±0.015     | 0.47±0.11              | 99               | –1                |
| Pr | 0.121±0.006     | 0.12±0.04              | 99               | –1                |
| Sc | 0.191±0.011     | 0.16±0.05              | 84               | –16               |
| Sm | 0.094±0.007     | 0.106±0.052            | 113              | 13                |
| Tb | 0.014±0.0011    | 0.025±0.017            | 179              | 79                |
| Tm | 0.0057±0.0007   | 0.009±0.004            | 158              | 58                |
| Y  | 0.46±0.06       | 0.40±0.08              | 87               | –13               |
| Yb | 0.040±0.004     | 0.058±0.017            | 145              | 45                |
| Th | 0.159±0.018     | 0.18±0.06              | 113              | 13                |
| U  | 0.082±0.008     | 0.096±0.034            | 117              | 17                |



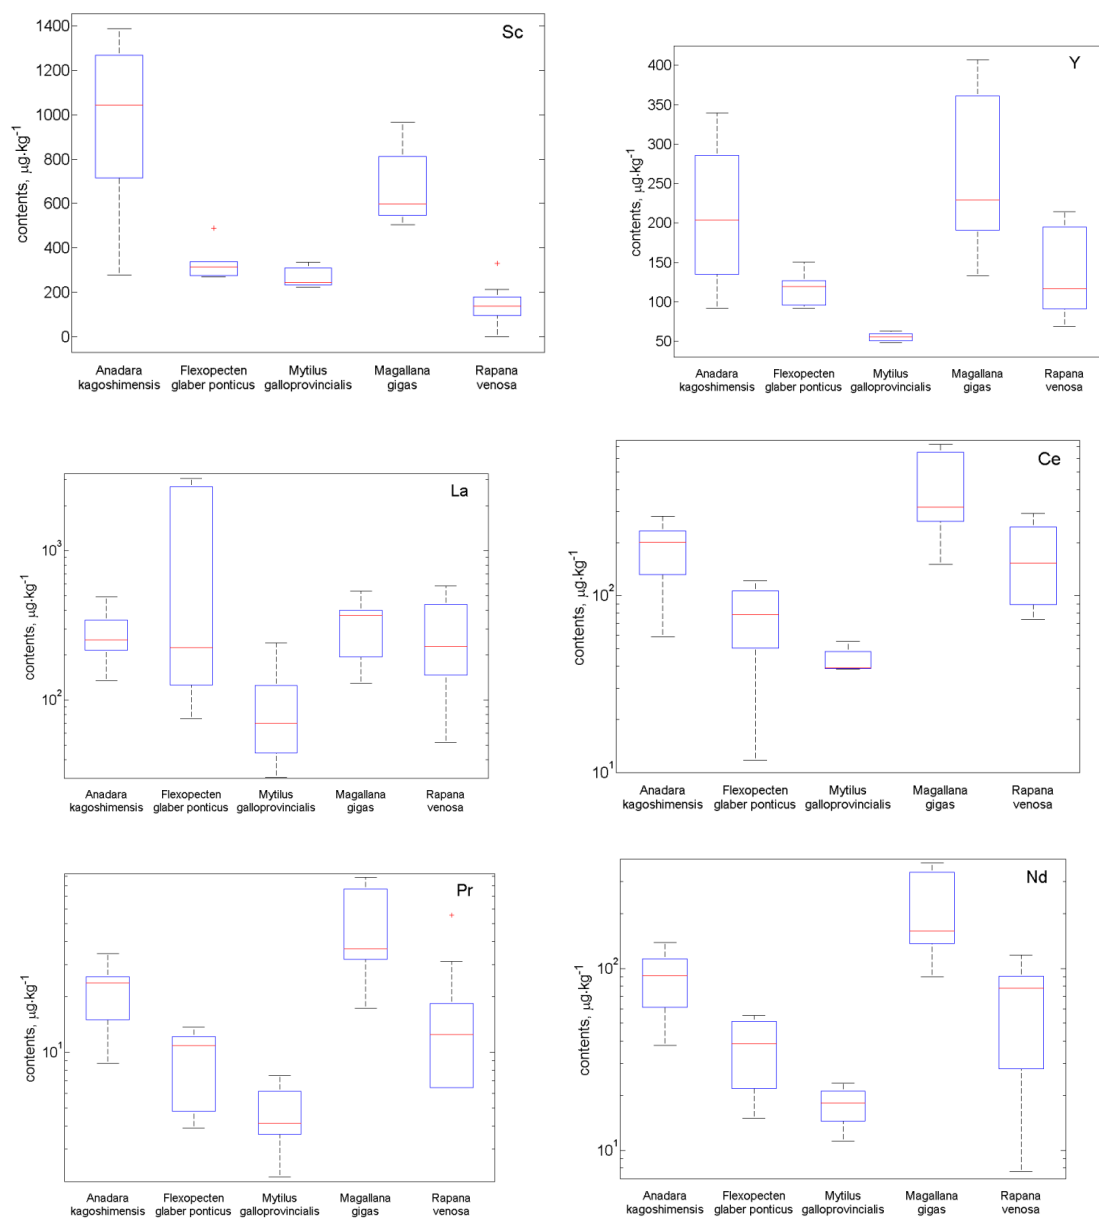

**Figure S1.** Boxplots of the rare earth element contents in shells of five molluscs from the Black Sea coast of Crimea.

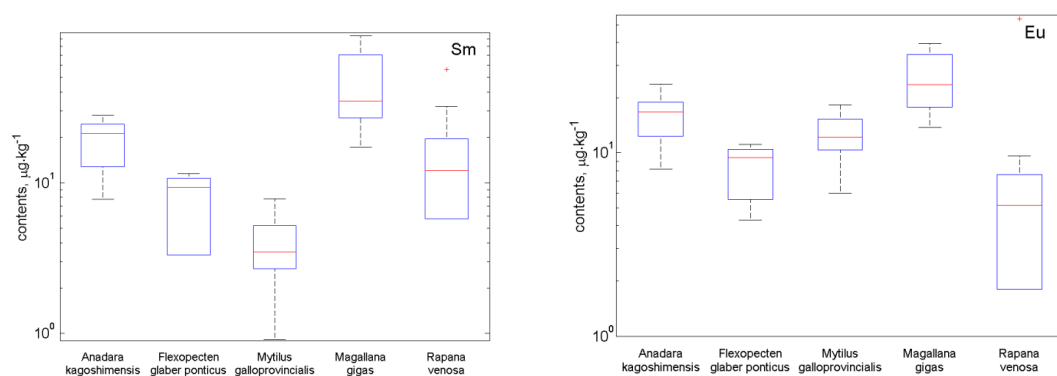



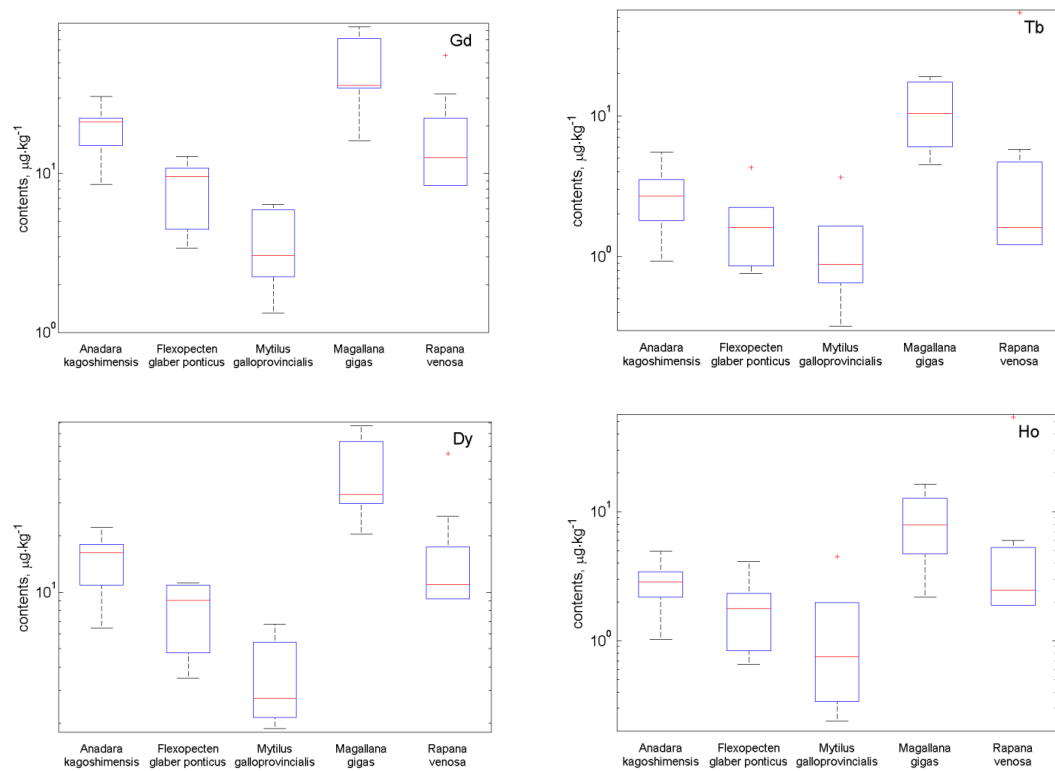

Figure S1. Continued.

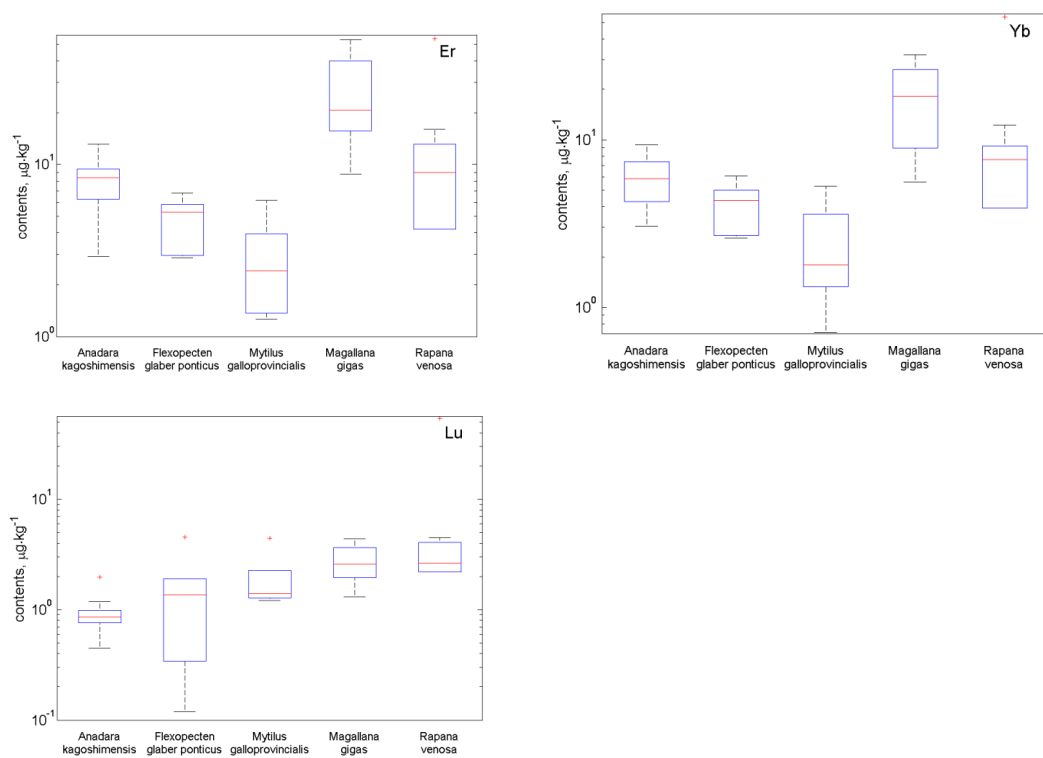

Figure S1. Continued.
